# Supplementary material for: HAND1 and BARX1 Act as Transcriptional and Anatomic Determinants of Malignancy in Gastrointestinal Stromal Tumor
Source: Oxford University Press journal article supplement (doi:10.1158/1078-0432.ccr-20-3538), 2021-01-15
Supplement: 10780432ccr203538-sup-251069_2_supp_6776327_ql3dwr.xlsx [file 10780432ccr203538-sup-251069_2_supp_6776327_ql3dwr.xlsx]

## Sheet: Sheet1
Comparator Group	Subgroup	n	Accession
"No Recurrence" Group	KIT-mutant	9	GSE71119, GSE95864
	PDGFRA-mutant	5	GSE71119, GSE95864
"Recurrent/Metastatic" Group	KIT mutant, Localized and later recurrent	3	GSE71119, GSE95864
	KIT mutant, Metastatic	8	GSE71119, GSE95864
SDH-Deficient GIST	n/a	10	GSE107447
Validation Cohort	All samples	75	PRJNA521803
	HAND1-positive	21	PRJNA521803
	BARX1-positive	39	PRJNA521803
