# Supplementary material for: HAND1 and BARX1 Act as Transcriptional and Anatomic Determinants of Malignancy in Gastrointestinal Stromal Tumor
Source: Oxford University Press journal article supplement (doi:10.1158/1078-0432.ccr-20-3538), 2021-01-15
Supplement: 10780432ccr203538-sup-251069_2_supp_6776329_ql3dwr.xlsx [file 10780432ccr203538-sup-251069_2_supp_6776329_ql3dwr.xlsx]

## Sheet: Sheet1
	All samples					All samples
	HAND1+	BARX1+	Double+			HAND1+	BARX1+	Double+
Ki67+	10595	5494	2265		PCNA+	12668	4271	1280
Ki67-	70906	59846	6930		PCNA-	68833	61069	7915
Total	81501	65340	9195		Total	81501	65340	9195
	0.129998	0.0840833	0.24633			0.155434	0.0653658	0.139206
	Stomach Localized Tumors					Stomach Localized Tumors
	HAND1+	BARX1+	Double+			HAND1+	BARX1+	Double+
Ki67+	174	802	185		PCNA+	41	340	38
Ki67-	1378	20784	1536		PCNA-	1511	21246	1683
Total	1552	21586	1721		Total	1552	21586	1721
	0.112113	0.0371537	0.107496			0.0264175	0.0157509	0.0220802
	IHC-Double Positive Tumors					IHC-Double Positive Tumors
	HAND1+	BARX1+	Double+			HAND1+	BARX1+	Double+
Ki67+	740	467	62		PCNA+	981	102	23
Ki67-	5610	4404	375		PCNA-	5369	4769	414
Total	6350	4871	437		Total	6350	4871	437
	0.116535	0.0958735	0.141876			0.154488	0.0209403	0.0526316
