# Supplementary material for: HAND1 and BARX1 Act as Transcriptional and Anatomic Determinants of Malignancy in Gastrointestinal Stromal Tumor
Source: Oxford University Press journal article supplement (doi:10.1158/1078-0432.ccr-20-3538), 2021-01-15
Supplement: 10780432ccr203538-sup-251069_2_supp_6776331_ql3dwr.xlsx [file 10780432ccr203538-sup-251069_2_supp_6776331_ql3dwr.xlsx]

## Sheet: Sheet1
Location	n	% of total	Mutation	n	% of total	Status	n	% of total
Esophagus/GEJ	1	16.6667	KIT	45	17.6471	Primary	44	13.8365
Stomach	23	10.9005	PDGFRA	0	0	Metasatic/recurrent	22	6.91824
SI	16	11.4286	SDH	4	28.5714
Colon	3	42.8571	Unknown	17	12.8788
Rectum	12	60
Unknown	11	20.7547
