# Supplementary material for: HAND1 and BARX1 Act as Transcriptional and Anatomic Determinants of Malignancy in Gastrointestinal Stromal Tumor
Source: Oxford University Press journal article supplement (doi:10.1158/1078-0432.ccr-20-3538), 2021-01-15
Supplement: 10780432ccr203538-sup-251069_2_supp_6776332_ql3dwr.xlsx [file 10780432ccr203538-sup-251069_2_supp_6776332_ql3dwr.xlsx]

## Sheet: Sheet1
Location	n	% of total	Mutation	n	% of total	Status	n	% of total
Esophagus/GEJ	3	50	KIT	4	1.56863	Primary	12	3.77358
SI	8	5.71429	PDGFRA	2	5.88235	Metasatic/Recurrent	1	0.314465
Colon	1	3	SDH	0	0
Rectum	1	12	Unknown	7	5.30303
